# Supplementary material for: Methanol steam reforming catalysts derived by reduction of perovskite-type oxides LaCo1−x−yPdxZnyO3±δ
Source: Royal Society of Chemistry journal article supplement (doi:10.1039/c5cy01410g), 2015-09-25
Supplement: c5cy01410g1.pdf [file c5cy01410g1.pdf]

## Supplementary Information

# Methanol steam reforming catalysts derived by reduction of perovskite-type oxides $\text{LaCo}_{1-x-y}\text{Pd}_x\text{Zn}_y\text{O}_{3\pm\delta}$

Jagoda Kuc<sup>1</sup>, Matthias Neumann<sup>2</sup>, Marc Armbrüster<sup>3</sup>, Songhak Yoon<sup>1</sup>, Yucheng Zhang<sup>4</sup>, Rolf Erni<sup>4</sup>, Anke Weidenkaff<sup>1,5</sup>, Santhosh Kumar Matam<sup>1\*</sup>

<sup>1</sup>*Empa, Swiss Federal Laboratories for Materials Science and Technology, Überlandstrasse  
129, CH-8600 Dübendorf, Switzerland*

<sup>2</sup>*Max-Planck-Institut für Chemische Physik fester Stoffe, D-01187 Dresden, Germany*

<sup>3</sup>*Faculty of Natural Sciences, Institute of Chemistry, Materials for Innovative Energy  
Concepts, Technische Universität Chemnitz, D-09107 Chemnitz, Germany*

<sup>4</sup>*Electron Microscopy Center, Empa, Swiss Federal Laboratories for Materials Science and  
Technology, Überlandstrasse 129, CH-8600 Dübendorf, Switzerland*

<sup>5</sup>*Materials Chemistry, Institute for Materials Science, University of Stuttgart, D-70569  
Stuttgart, Germany*

*\*corresponding author:*

*E-mail: santhosh.matam@empa.ch*

Phone: +41 58 765 4706; Fax: +41 58 765 6919

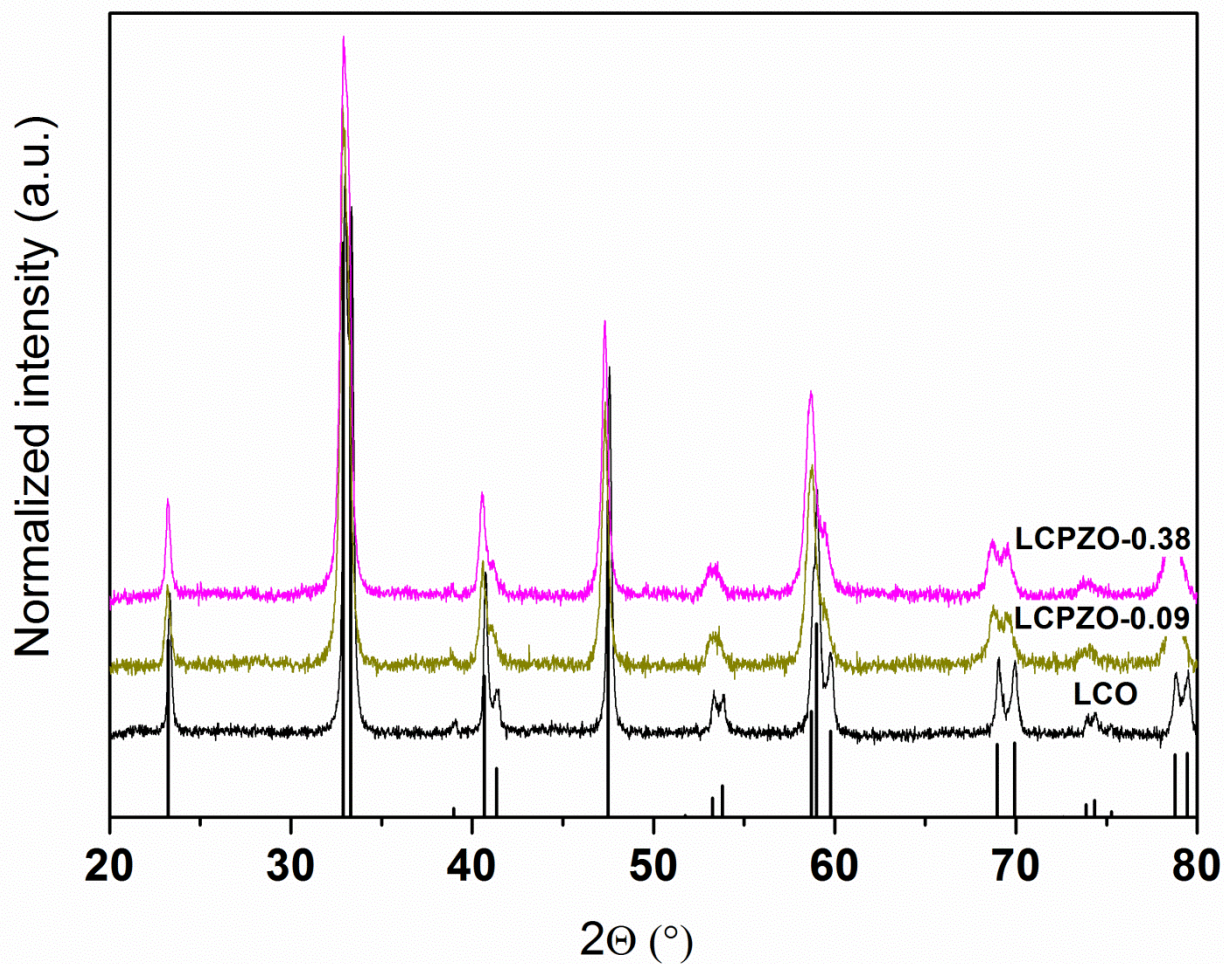

Fig. S1. XRD patterns of the catalysts recorded at ambient atmosphere. The reference perovskite-type oxide rhombohedral crystal structure is shown in line pattern.

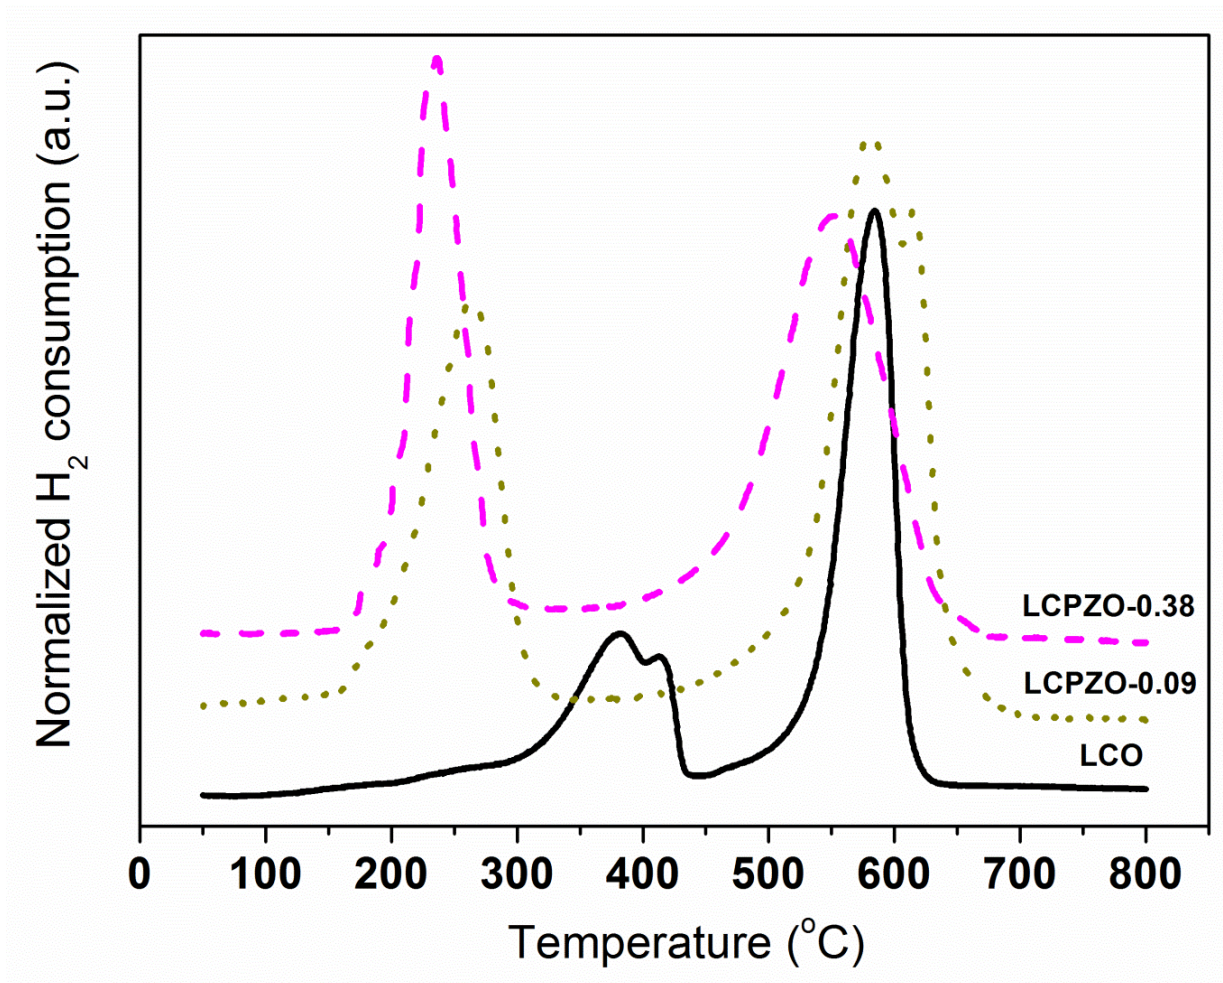

Fig. S2. H<sub>2</sub>-TPR profiles of the catalysts.

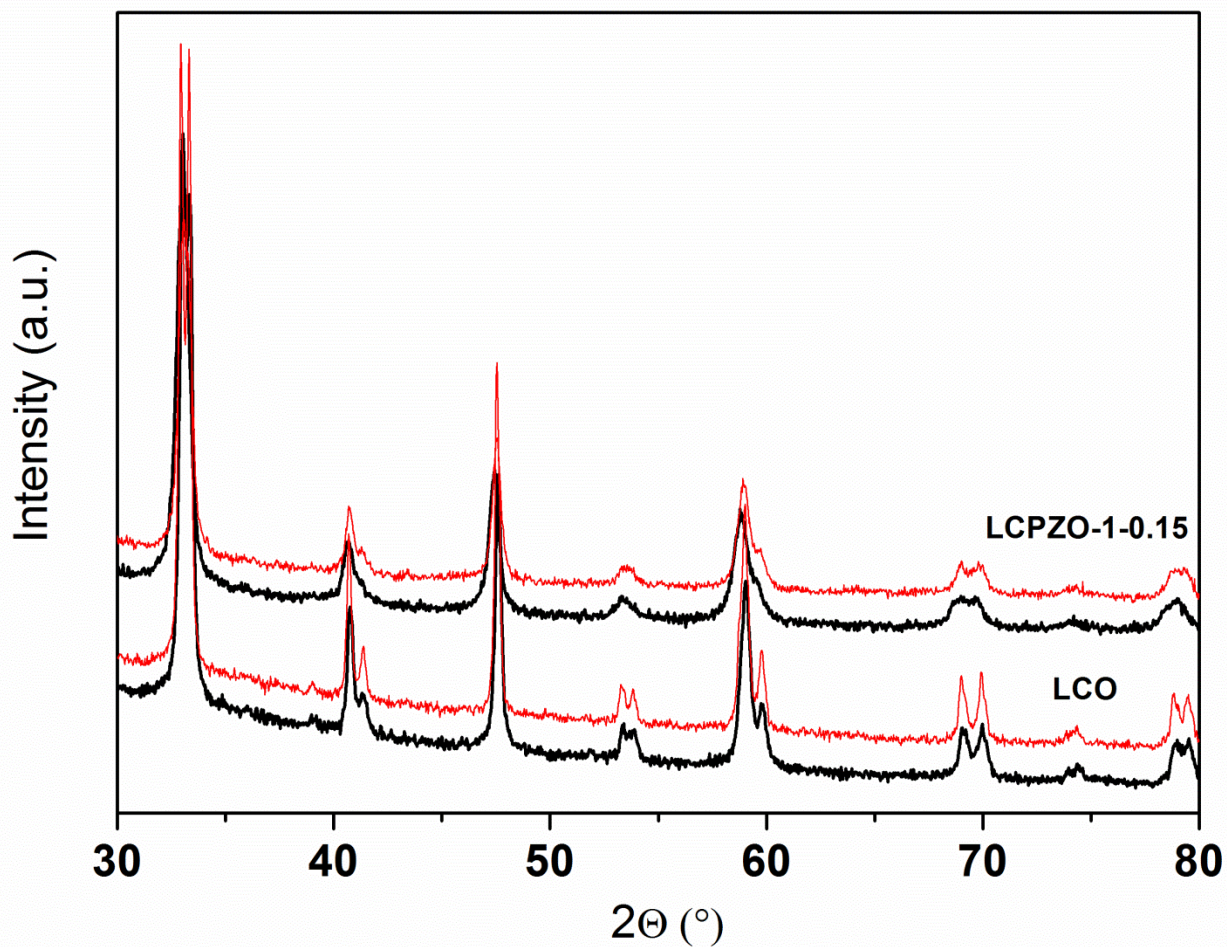

Fig. S3. XRD patterns of the catalysts recorded at room temperature before being subjected to TPR (below – black thick pattern) and after reduction/re-oxidation cycle (above – red thin pattern).

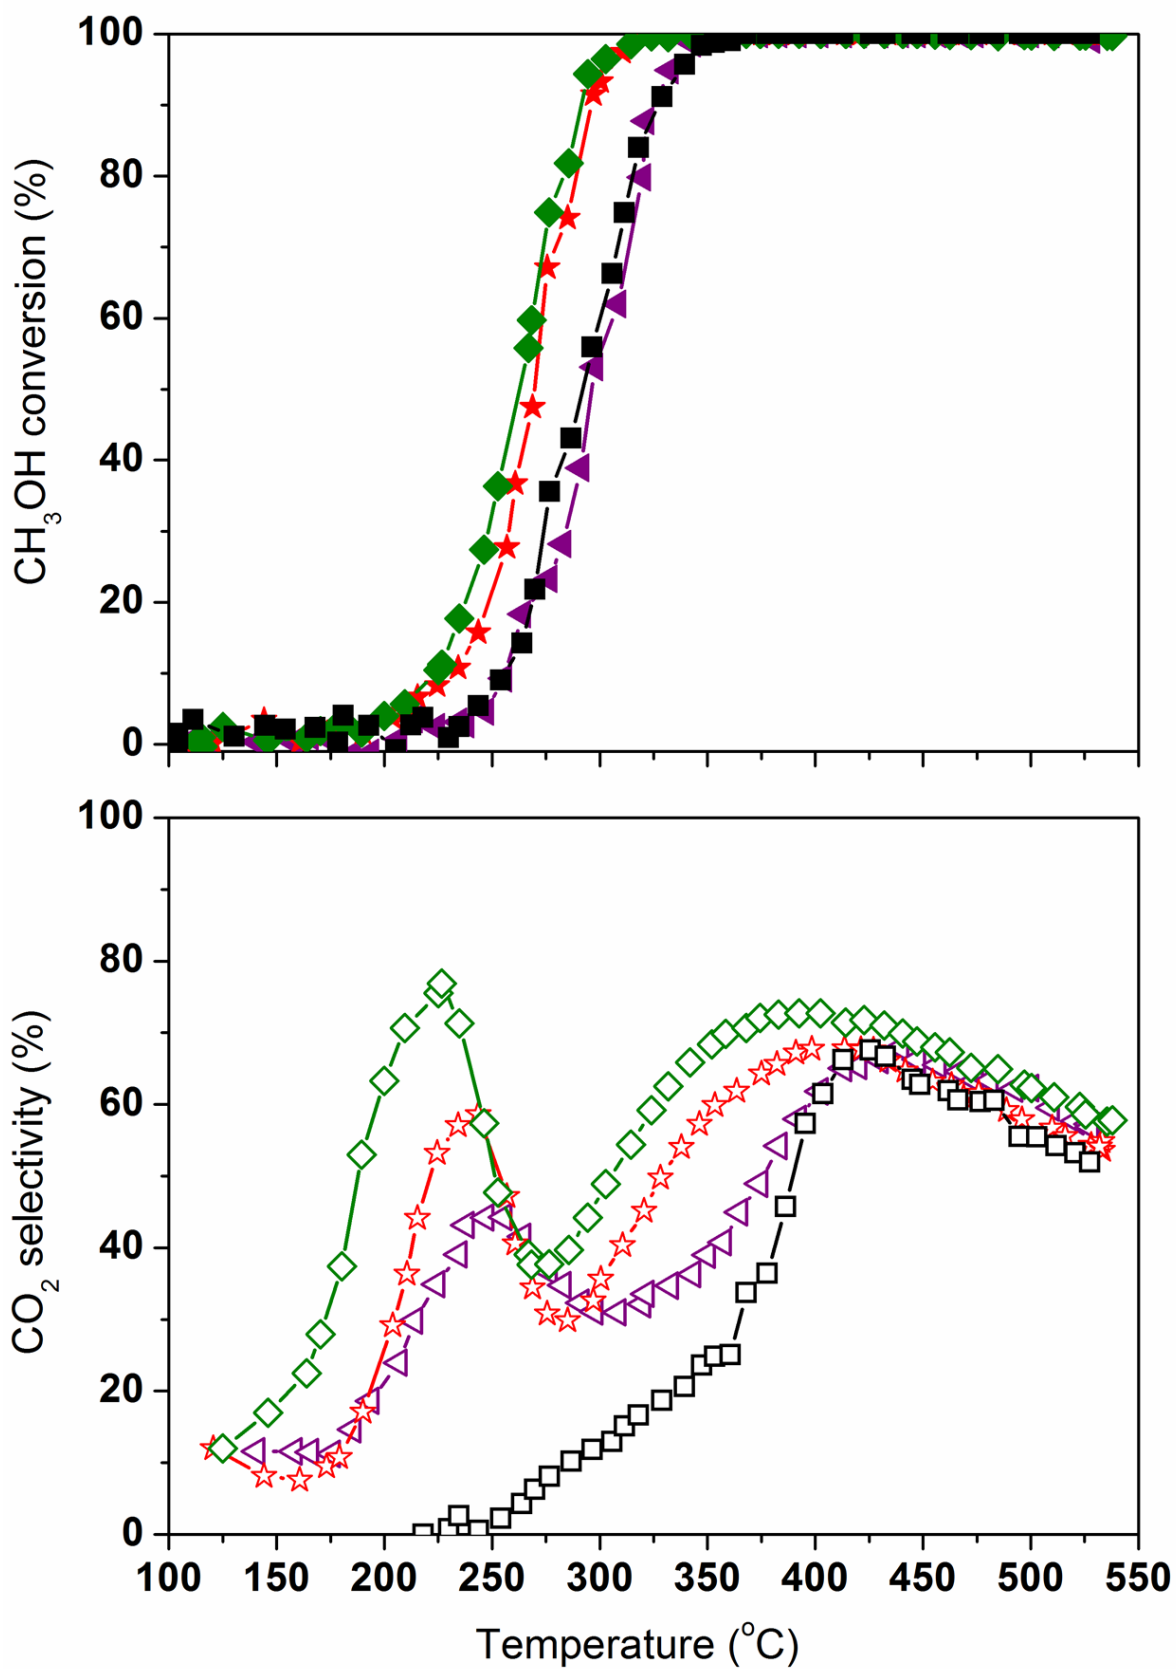

Fig. S4. The effect of Pd and Zn concentration (at 1:1 molar ratio) on the MSR performance of the catalysts: LCO (■, □), LCPZO-1-0.05 (▼, ▽), LCPZO-1-0.15 (★, ☆) and LCPZO-1-0.25 (◆, ◇).
